# Supplementary material for: Oncogenic microRNA-4534 regulates PTEN pathway in prostate cancer
Source: PubMed Central journal article supplement (PMC5356562; doi:10.18632/oncotarget.12031), 2016-09-15
Supplement: oncotarget-07-68371-s001.pdf [file oncotarget-07-68371-s001.pdf]

## Oncogenic microRNA-4534 regulates PTEN pathway in prostate cancer

### Supplementary Materials

**Supplementary Table S1: Clinicopathologic characteristics of prostate cancer patients (N = 84)**

| Characteristics               | Patient set†                   |
|-------------------------------|--------------------------------|
| <b>Age, Years</b>             | <b>Number of patients (84)</b> |
| Mean                          | 62                             |
| Median                        | 68                             |
| Range                         | 48–81                          |
| <b>T-stage</b>                |                                |
| pT2                           | 58                             |
| pT3-pT4                       | 26                             |
| <b>Gleason Score</b>          |                                |
| < 7                           | 41                             |
| 7                             | 33                             |
| > 7                           | 9                              |
| <b>PSA failure</b>            |                                |
| Yes                           | 34                             |
| <b>Pathological diagnosis</b> |                                |
| Adenocarcinoma                | 84                             |

†miR-4534 expression determined from matched laser captured microdissected tissues.

**Supplementary Table S2: Complimentary sequences in 3'UTRs of PTEN for miR-4534 and sequences of primers and probes**

|                                                                                                                                                                                                                                                                                                                                                                                                                                                                                                                                                                                                                                                                                                                                                                                                                                                                                                                                                                                              |
|----------------------------------------------------------------------------------------------------------------------------------------------------------------------------------------------------------------------------------------------------------------------------------------------------------------------------------------------------------------------------------------------------------------------------------------------------------------------------------------------------------------------------------------------------------------------------------------------------------------------------------------------------------------------------------------------------------------------------------------------------------------------------------------------------------------------------------------------------------------------------------------------------------------------------------------------------------------------------------------------|
| <p><b>Complimentary sequences in 3'UTRs of PTEN for miR-4534 form miRBD</b></p> <p>3'UCUGGGGAGGAGGUAG-G 5'miR-4534</p> <p>             </p> <p>5'TAACGACTT CTCCATCTC 3' 911:PTEN 3UTR</p> <p>3'UCUGGGGAGGAGGUAG-G 5'iR-4534</p> <p>             </p> <p>5'TATTGA <u>AA</u>T <u>TAATCGATA</u> 3' 911:Mutant vector (Mutant PTEN 3UTR)</p> <p>Underlined sequences in miR-4534 mature sequence were changed for mutated 3'UTR (Mutant vector) sequences.</p> <p><b>The primers for amplifying CpG islands are:</b></p> <p>F1: 5' GTGATTTATTTTTGTAAGTTTAGTATTTGGGAG 3'(forward)</p> <p>R1: 5' ACAAATACRTACCACCATACCCAA 3' (reverse)</p> <p>The probes for methylation/unmethylation specific realtime PCR were synthesized by Applied Biosystems (Foster City, CA, USA), labeled with 6FAM reporter at 5' end and with MGB quencher at 3'end. The sequences are:</p> <p>M: 5' CGAGGCGGGTAGATTATTTGAG 3' (Methylation reaction)</p> <p>U: 5' TGAGGTGGGTAGATTATTTGAG (Unmethylation reaction)</p> |
|----------------------------------------------------------------------------------------------------------------------------------------------------------------------------------------------------------------------------------------------------------------------------------------------------------------------------------------------------------------------------------------------------------------------------------------------------------------------------------------------------------------------------------------------------------------------------------------------------------------------------------------------------------------------------------------------------------------------------------------------------------------------------------------------------------------------------------------------------------------------------------------------------------------------------------------------------------------------------------------------|
